# Supplementary material for: Evidence for temporal population replacement and the signature of ecological adaptation in a major Neotropical malaria vector in Amazonian Peru
Source: PubMed Central journal article supplement (PMC4587789; doi:10.1186/s12936-015-0863-4), 2015-09-29

**Additional file 6.** Forest cover percentage determined using satellite imagery and hemispherical photography by locality and forest cover level.

| Habitat  | Locality | Forest Cover Level | Calculated Forest Cover  |                           |                           |
|----------|----------|--------------------|--------------------------|---------------------------|---------------------------|
|          |          |                    | Satellite Imagery (50 m) | Satellite Imagery (100 m) | Hemispherical Photography |
| Riverine | CAH      | Peridomestic       | 3.00%                    | 27.60%                    | 7.87%                     |
|          |          | Chacra             | 42.80%                   | 50.80%                    | 7.39%                     |
|          |          | Forest             | 100.00%                  | 98.20%                    | 93.57%                    |
|          | NPR      | Peridomestic       | 83.40%                   | 91.30%                    | 43.85%                    |
|          |          | Chacra             | 92.10%                   | 97.90%                    | 52.02%                    |
|          |          | Forest             | 100.00%                  | 100.00%                   | 88.68%                    |
|          | SEM      | Peridomestic       | 27.80%                   | 50.20%                    | 28.24%                    |
|          |          | Chacra             | 67.60%                   | 75.20%                    | 30.45%                    |
|          |          | Forest             | 85.50%                   | 88.40%                    | 89.99%                    |
| Highway  | DOR      | Peridomestic       | 30.80%                   | 27.60%                    | 10.72%                    |
|          |          | Chacra             | 68.80%                   | 76.90%                    | 45.16%                    |
|          |          | Forest             | 94.20%                   | 68.20%                    | 85.95%                    |
|          | NHO      | Peridomestic       | 21.10%                   | 35.80%                    | 8.17%                     |
|          |          | Chacra             | 27.80%                   | 41.70%                    | 23.95%                    |
|          |          | Forest             | 90.20%                   | 95.20%                    | 79.40%                    |
|          | TRI      | Peridomestic       | 6.60%                    | 8.60%                     | 1.07%                     |
|          |          | Chacra             | 61.60%                   | 49.30%**                  | 33.59%                    |
|          |          | Forest             | 82.20%                   | 78.00%                    | 89.48%                    |

\*\*Cloud obstructing view, could not calculate accurately



50m

|          |       | peri    | chacra  | forest  |
|----------|-------|---------|---------|---------|
| Riverine | mean  | 38.07%  | 67.50%  | 95.17%  |
|          | stdev | 0.41172 | 0.2465  | 0.08372 |
|          | 95CI  | 0.80696 | 0.48314 | 0.16408 |
| Highway  | mean  | 19.50%  | 52.73%  | 88.87%  |
|          | stdev | 0.12179 | 0.21891 | 0.0611  |
|          | 95CI  | 0.23871 | 0.42906 | 0.11976 |

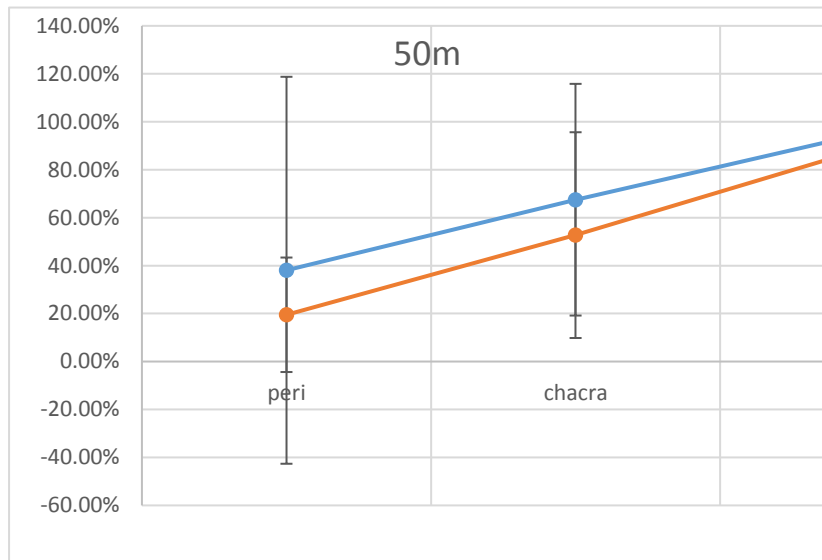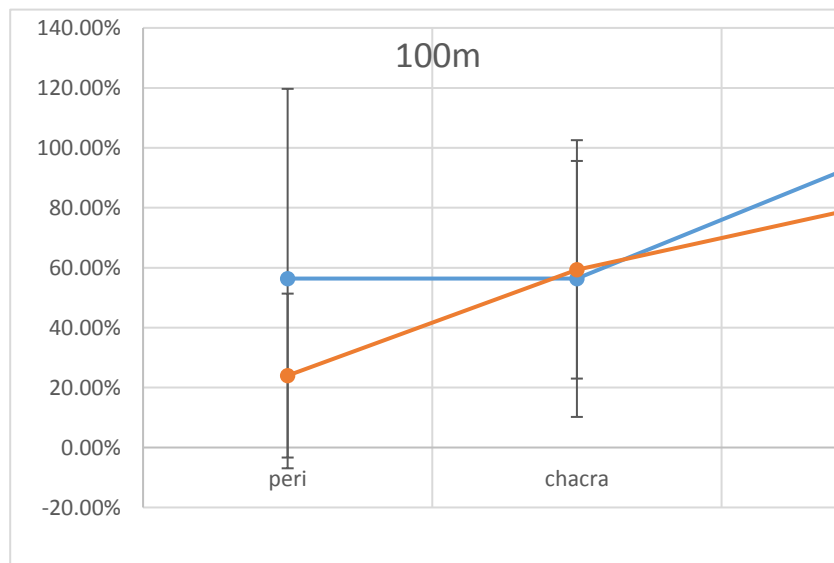

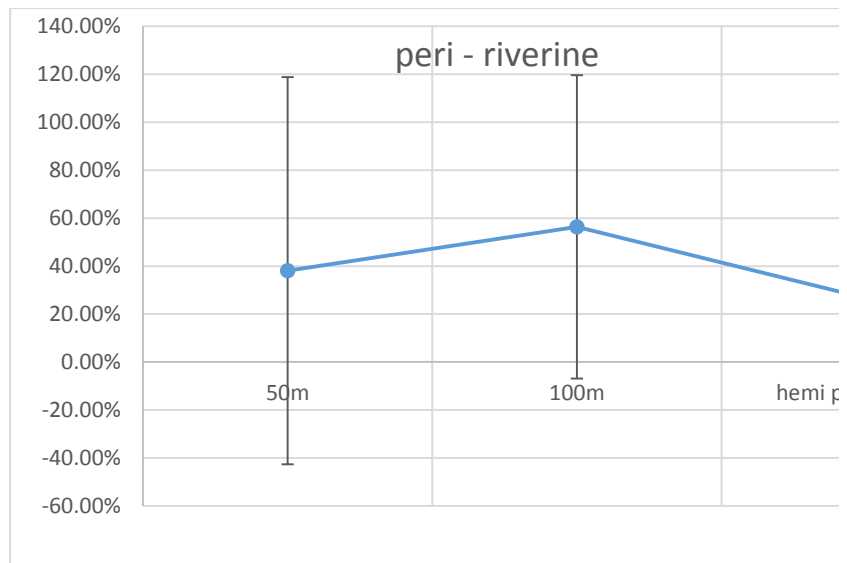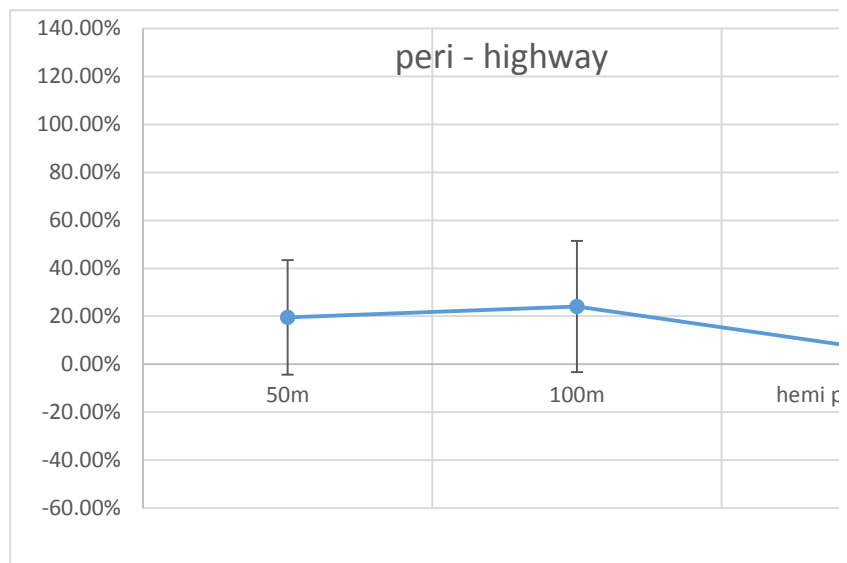

100m

hemi photography

| peri    | chacra  | forest  |
|---------|---------|---------|
| 56.37%  | 56.37%  | 95.53%  |
| 0.32295 | 0.23555 | 0.06243 |
| 0.63297 | 0.46168 | 0.12236 |
| 24.00%  | 59.30%  | 80.47%  |
| 0.13953 | 0.18523 | 0.13668 |
| 0.27347 | 0.36305 | 0.26789 |

| peri    | chacra  | forest  |
|---------|---------|---------|
| 26.65%  | 29.95%  | 90.75%  |
| 0.18042 | 0.22319 | 0.02531 |
| 0.35363 | 0.43746 | 0.04961 |
| 6.65%   | 34.23%  | 84.94%  |
| 0.05001 | 0.1062  | 0.05115 |
| 0.09801 | 0.20814 | 0.10025 |

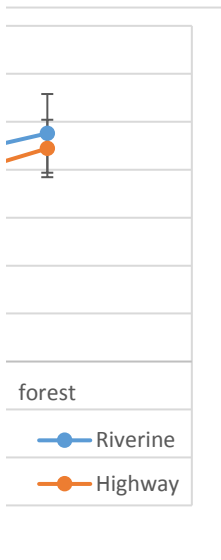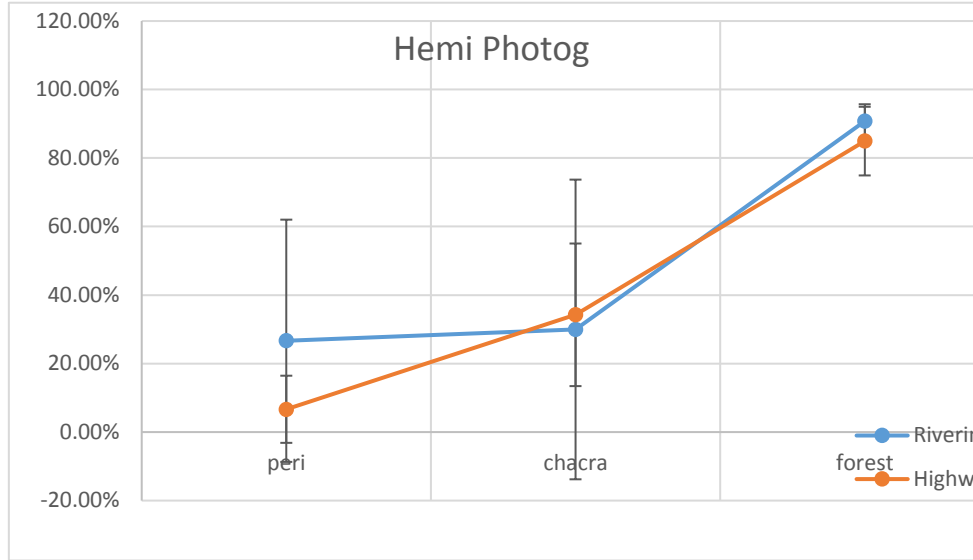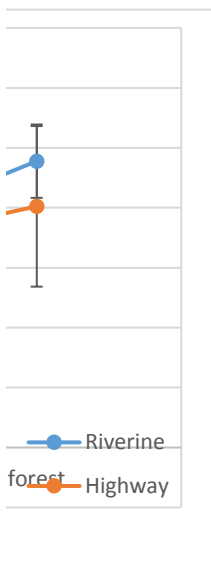

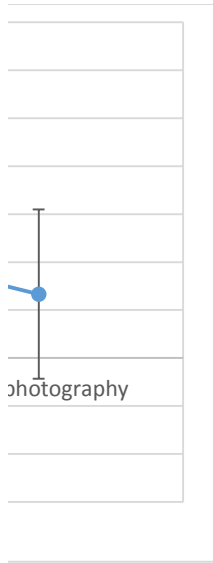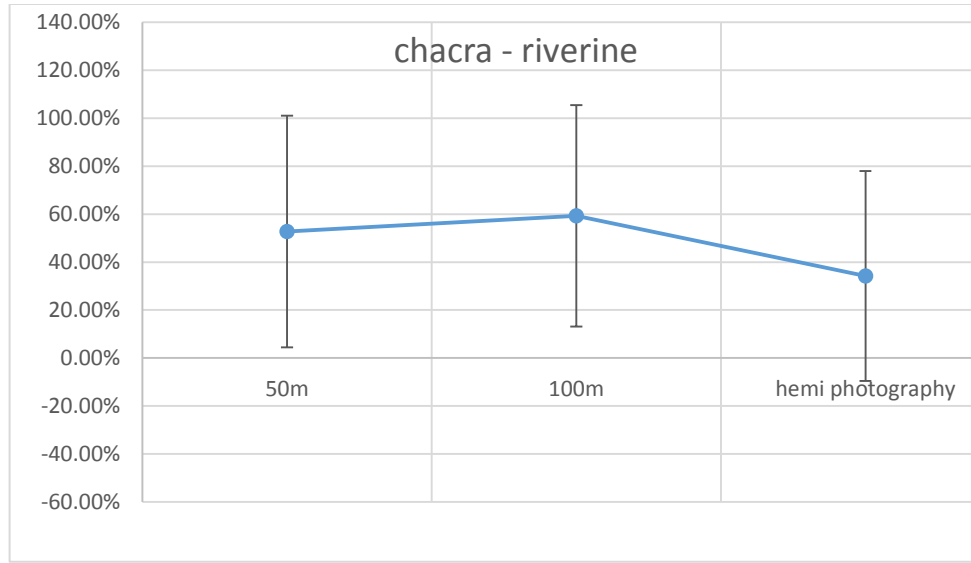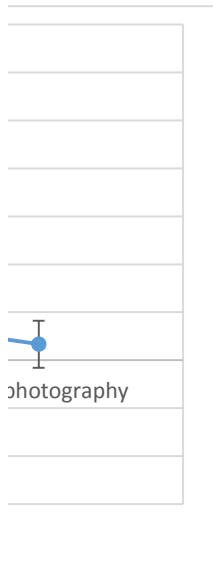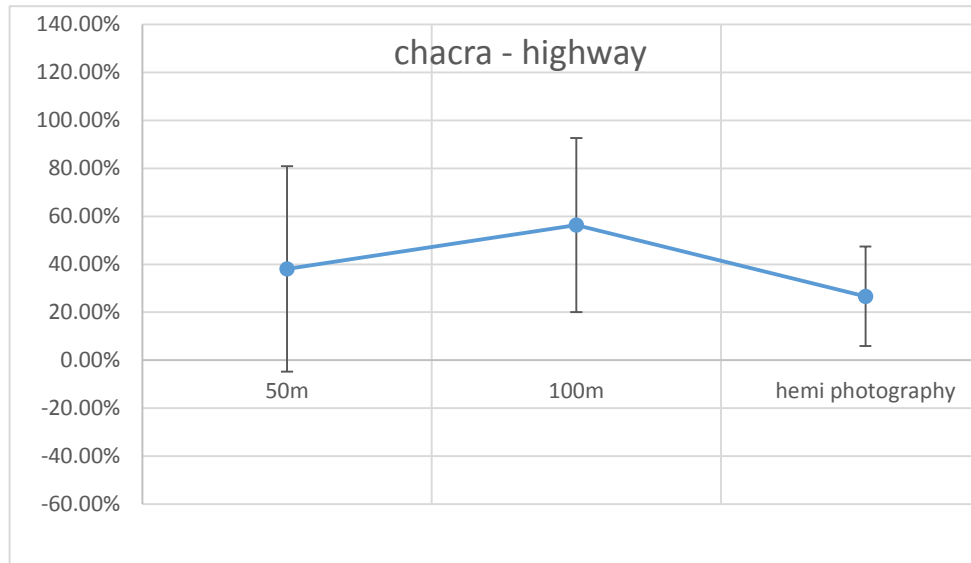

ne  
ray

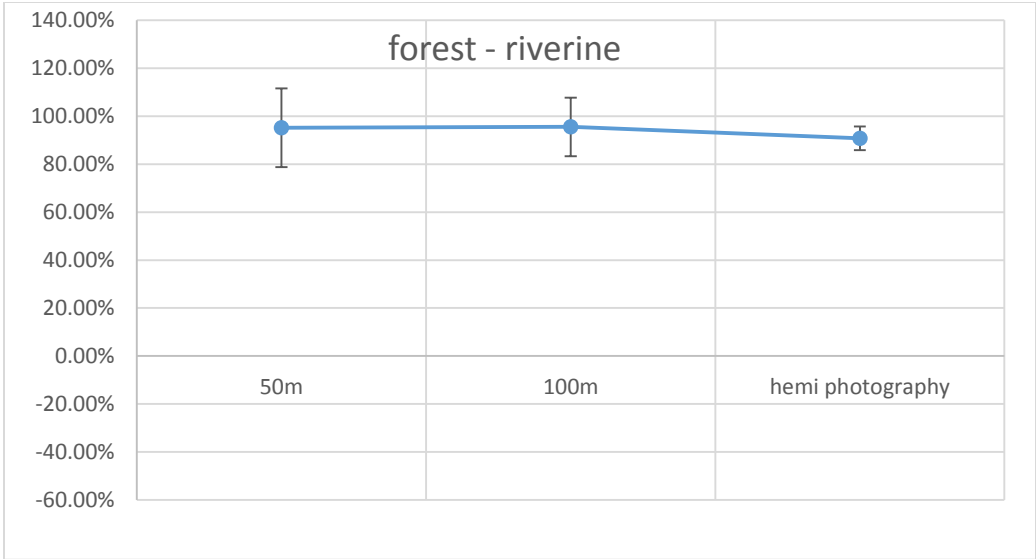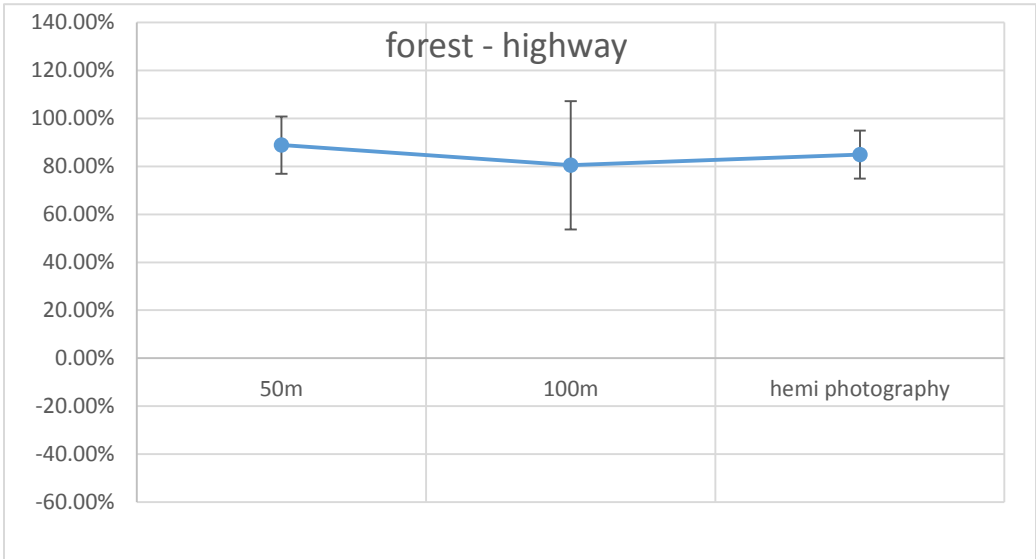

Supplement: 12936_2015_863_MOESM6_ESM.pdf [file 12936_2015_863_MOESM6_ESM.pdf]
