# Supplementary material for: Evidence for temporal population replacement and the signature of ecological adaptation in a major Neotropical malaria vector in Amazonian Peru
Source: PubMed Central journal article supplement (PMC4587789; doi:10.1186/s12936-015-0863-4), 2015-09-29
Supplement: 12936_2015_863_MOESM1_ESM.pdf [file 12936_2015_863_MOESM1_ESM.pdf]

**Additional file 1. *Anopheles darlingi* collection information.**

| Locality                         | Forest Cover Level | Latitude         | Longitude        | # <i>An. darlingi</i> * | Distance from River                     | Dates of Collection                             |
|----------------------------------|--------------------|------------------|------------------|-------------------------|-----------------------------------------|-------------------------------------------------|
| <b>Current Study</b>             |                    |                  |                  |                         |                                         |                                                 |
| Cahuide (CAH)                    |                    |                  |                  | 141 (141)               | 0 km                                    | March/October 2012, April - June 2013, May 2014 |
|                                  | Peridomestic       | 04° 13' 49.26" S | 73° 29' 16.20" W | 106                     |                                         |                                                 |
|                                  | Chacra             | 04° 14' 55.21" S | 73° 29' 40.92" W | 14                      |                                         |                                                 |
| El Dorado (DOR)                  | Forest             | 04° 14' 26.88" S | 73° 29' 55.00" W | 21                      |                                         | April - June 2013, June 2014                    |
|                                  | Peridomestic       | 03° 57' 18.60" S | 73° 24' 18.48" W | 26                      | 5.91 km                                 |                                                 |
|                                  | Chacra             | 03° 57' 44.03" S | 73° 23' 56.04" W | 26                      |                                         |                                                 |
| El Triunfo (TRI)                 | Forest             | 03° 58' 09.53" S | 73° 23' 49.27" W | 25                      |                                         | April - June 2013, May 2014                     |
|                                  | Peridomestic       | 04° 08' 58.32" S | 73° 28' 25.02" W | 17                      | 8 km                                    |                                                 |
|                                  | Chacra             | 04° 09' 51.95" S | 73° 28' 27.01" W | 14                      |                                         |                                                 |
| Nuevo Horizonte (NHO)            | Forest             | 04° 09' 11.05" S | 73° 28' 56.17" W | 22                      |                                         | April - June 2013, June 2014                    |
|                                  | Peridomestic       | 04° 03' 54.30" S | 73° 26' 28.62" W | 27                      | 6.68 km                                 |                                                 |
|                                  | Chacra             | 04° 04' 33.78" S | 73° 26' 45.89" W | 26                      |                                         |                                                 |
| Nuevo Progreso (NPR)             | Forest             | 04° 04' 29.75" S | 73° 26' 32.86" W | 27                      |                                         | April - June 2013, May 2014                     |
|                                  | Peridomestic       | 04° 12' 30.12" S | 73° 25' 26.82" W | 23                      | 0.27 km (dry season), 0 km (wet season) |                                                 |
|                                  | Chacra             | 04° 12' 34.20" S | 73° 25' 35.58" W | 27                      |                                         |                                                 |
| San Jose de Lupuna (LUP)         | Forest             | 04° 12' 56.59" S | 73° 25' 26.62" W | 24                      |                                         | February/April 2012                             |
| Santa Emilia (SEM)               | Peridomestic       | 03° 44' 35.45" S | 73° 19' 36.91" W | 99 (99)                 | 0.84 km (dry season), 0 km (wet season) | October 2013 - February 2014, April - May 2014  |
|                                  | Chacra             | 04° 11' 58.99" S | 74° 12' 20.12" W | 30                      | 0 km                                    |                                                 |
|                                  | Forest             | 04° 11' 56.08" S | 74° 12' 54.94" W | 30                      |                                         |                                                 |
| Santo Tomas (STO)                | Peridomestic       | 04° 11' 58.99" S | 74° 12' 20.12" W | 30                      |                                         | March/October 2012                              |
| Villa del Buen Pastor (VBP)      | Peridomestic       | 03° 48' 07.74" S | 73° 20' 19.50" W | 18 (18)                 | 0 km                                    | February/October 2012                           |
|                                  |                    | 03° 56' 59.82" S | 73° 21' 39.24" W | 61 (59)                 | 2.32 km                                 |                                                 |
| <b>Mirabello et al. (2008)</b>   |                    |                  |                  |                         |                                         |                                                 |
| <b>Belize</b>                    |                    |                  |                  |                         |                                         |                                                 |
| Caves Branch (CAV)               | n/a                | 17° 09' 00.00" N | 88° 40' 01.80" W | 34                      | n/a                                     | March 2006                                      |
| Golden Stream (GOL)              | n/a                | 16° 21' 48.84" N | 88° 47' 55.20" W | 39                      | n/a                                     | March 2006                                      |
| Sibun (SIB)                      | n/a                | 17° 08' 53.22" N | 88° 37' 41.34" W | 24                      | n/a                                     | March 2006                                      |
| <b>Guatemala</b>                 |                    |                  |                  |                         |                                         |                                                 |
| El Penon (ELP)                   | n/a                | 16° 01' 47.64" N | 90° 46' 29.64" W | 28                      | n/a                                     | September 2000                                  |
| San Pablo (SPB)                  | n/a                | 15° 58' 05.88" N | 90° 47' 24.00" W | 31                      | n/a                                     | September 2000                                  |
| Santa Rosa (SRO)                 | n/a                | 15° 58' 38.64" N | 90° 50' 53.88" W | 39                      | n/a                                     | September 2000                                  |
| <b>Brazil</b>                    |                    |                  |                  |                         |                                         |                                                 |
| Boa Vista (BV)                   | n/a                | 02° 49' 00.00" N | 60° 40' 00.00" W | 56                      | n/a                                     | July 2003                                       |
| Palito (IT)                      | n/a                | 06° 33' 53.00" S | 56° 31' 37.00" W | 52                      | n/a                                     | July 2003                                       |
| <b>Peru</b>                      |                    |                  |                  |                         |                                         |                                                 |
| Mazan (MAZ)                      | n/a                | 03° 29' 32.32" S | 73° 14' 30.52" W | 48                      | n/a                                     | February 2006                                   |
| Nauta (NAU)                      | n/a                | 04° 30' 41.65" S | 73° 35' 08.74" W | 51                      | n/a                                     | February 2006                                   |
| Padre Cocha (PCO)                | n/a                | 03° 42' 12.38" S | 73° 16' 58.48" W | 47                      | n/a                                     | January 2006                                    |
| Piura, Rio Tigre (PRT)           | n/a                | 04° 06' 35.76" S | 74° 25' 05.16" W | 17                      | n/a                                     | February/March 2006                             |
| Shishita, Pevas (SHP)            | n/a                | 03° 22' 34.61" S | 71° 43' 38.42" W | 54                      | n/a                                     | March 2006                                      |
| San Esteban (SAE)                | n/a                | 03° 56' 48.55" S | 70° 30' 57.56" W | 44                      | n/a                                     | March 2006                                      |
| Zungarococha (ZUN)               | n/a                | 03° 49' 33.92" S | 73° 21' 04.72" W | 50                      | n/a                                     | January 2006                                    |
| <b>Conn et al. (2006)</b>        |                    |                  |                  |                         |                                         |                                                 |
| <b>Brazil</b>                    |                    |                  |                  |                         |                                         |                                                 |
| Aracanga (ARA)                   | n/a                | 01° 37' 00.00" S | 48° 36' 00.00" W | 38                      | n/a                                     | 1997-1999                                       |
| Belem (BEL)                      | n/a                | 01° 41' 00.00" S | 48° 40' 00.00" W | 41                      | n/a                                     | 1997-2000                                       |
| Moju (MOJ)                       | n/a                | 01° 52' 00.00" S | 48° 45' 00.00" W | 26                      | n/a                                     | 1997-2001                                       |
| Peixoto de Azevedo (PEX)         | n/a                | 10° 23' 00.00" S | 54° 54' 00.00" W | 23                      | n/a                                     | 1997-2002                                       |
| Lagoa dos Indios (LI)            | n/a                | 00° 02' 00.00" S | 51° 11' 00.00" W | 39                      | n/a                                     | 1997-2003                                       |
| Granja Alves (GA)                | n/a                | 00° 02' 00.00" S | 51° 05' 00.00" W | 40                      | n/a                                     | 1997-2004                                       |
| Santana (STN)                    | n/a                | 00° 01' 00.00" S | 51° 09' 00.00" W | 39                      | n/a                                     | 1997-2005                                       |
| <b>Scarpassa and Conn (2007)</b> |                    |                  |                  |                         |                                         |                                                 |
| <b>Brazil</b>                    |                    |                  |                  |                         |                                         |                                                 |
| Bancrevea (BAN)                  | n/a                | 02° 59' 00.00" S | 60° 04' 00.00" W | 32                      | n/a                                     | April 1998                                      |
| Ramal do Brasileirinho (RBR)     | n/a                | 03° 01' 00.00" S | 59° 57' 00.00" W | 44                      | n/a                                     | July 1998                                       |
| Coari (COA)                      | n/a                | 04° 05' 00.00" S | 63° 08' 00.00" W | 43                      | n/a                                     | June 2001                                       |
| Castanho (CAS)                   | n/a                | 03° 49' 00.00" S | 60° 21' 00.00" W | 40                      | n/a                                     | June 1998                                       |
| Novo Airao (NAI)                 | n/a                | 01° 56' 00.00" S | 61° 22' 00.00" W | 34                      | n/a                                     | December 1998                                   |
| Porto Velho (PVE)                | n/a                | 08° 45' 00.00" S | 63° 53' 00.00" W | 40                      | n/a                                     | April 2002                                      |
| Municipality of Acrelandia (MAC) | n/a                | 10° 08' 00.00" S | 67° 32' 00.00" W | 22                      | n/a                                     | August 2002                                     |
| Sao Miguel (SMI)                 | n/a                | 08° 36' 00.00" S | 63° 49' 00.00" W | 40                      | n/a                                     | April 2002                                      |
| <b>Gutierrez et al. (2010)</b>   |                    |                  |                  |                         |                                         |                                                 |
| <b>Colombia</b>                  |                    |                  |                  |                         |                                         |                                                 |
| Montelibano (MTL)                | n/a                | 07° 58' 48.00" N | 75° 25' 12.00" W | 25                      | n/a                                     | 2006-2008                                       |
| Puerto Libertador (PLT)          | n/a                | 07° 54' 00.00" N | 75° 40' 12.00" W | 38                      | n/a                                     | 2006-2008                                       |
| El Bagre (BAG)                   | n/a                | 07° 34' 48.00" N | 74° 48' 00.00" W | 35                      | n/a                                     | 2006-2008                                       |
| Zaragoza (ZAR)                   | n/a                | 07° 28' 48.00" N | 74° 52' 12.00" W | 7                       | n/a                                     | 2006-2008                                       |
| <b>Angella et al. (2014)</b>     |                    |                  |                  |                         |                                         |                                                 |
| <b>Brazil</b>                    |                    |                  |                  |                         |                                         |                                                 |
| Vila Candelaria (CAN)            | n/a                | 08° 46' 42.20" S | 63° 54' 59.50" W | 16                      | n/a                                     | 2007-2008                                       |
| Engenho Velho (ENV)              | n/a                | 08° 46' 23.60" S | 63° 55' 19.70" W | 24                      | n/a                                     | 2007-2008                                       |
| Jaci Parana (JAP)                | n/a                | 09° 14' 30.00" S | 64° 23' 44.00" W | 21                      | n/a                                     | 2007-2008                                       |
| Santo Antonio (STA)              | n/a                | 08° 47' 25.40" S | 63° 55' 25.70" W | 10                      | n/a                                     | 2007-2008                                       |
| Amazonas (AMA)                   | n/a                | 08° 50' 49.80" S | 64° 02' 09.60" W | 21                      | n/a                                     | 2007-2008                                       |
| Teotônio (TEO)                   | n/a                | 08° 50' 20.50" S | 64° 02' 18.00" W | 15                      | n/a                                     | 2007-2008                                       |
| Bate Estaca (BAT)                | n/a                | 08° 46' 04.50" S | 63° 54' 11.10" W | 15                      | n/a                                     | 2007-2008                                       |
| <b>Moreno, unpubl.</b>           |                    |                  |                  |                         |                                         |                                                 |
| <b>Bolivia</b>                   |                    |                  |                  |                         |                                         |                                                 |
| Guayaramerin (BGU)               | n/a                | 10° 49' 01.20" S | 65° 24' 00.00" W | 12                      | n/a                                     | 1991                                            |
| <b>Venezuela</b>                 |                    |                  |                  |                         |                                         |                                                 |
| Fortuna de Albarico (FOR)        | n/a                | 05° 58' 01.20" N | 67° 25' 01.20" W | 8                       | n/a                                     | 1992-1993                                       |

\* Number of *An. darlingi* used in microsatellite analyses; Current study mosquitoes: number analyzed with 13 microsatellite loci (number analyzed with 5 microsatellite loci)
