# Supplementary material for: Evidence for temporal population replacement and the signature of ecological adaptation in a major Neotropical malaria vector in Amazonian Peru
Source: PubMed Central journal article supplement (PMC4587789; doi:10.1186/s12936-015-0863-4), 2015-09-29
Supplement: 12936_2015_863_MOESM2_ESM.pdf [file 12936_2015_863_MOESM2_ESM.pdf]

Peridomestic

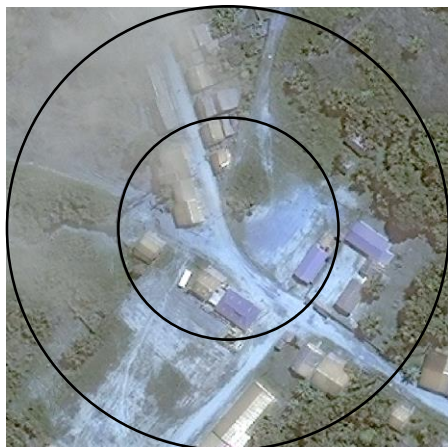

*Chacra*

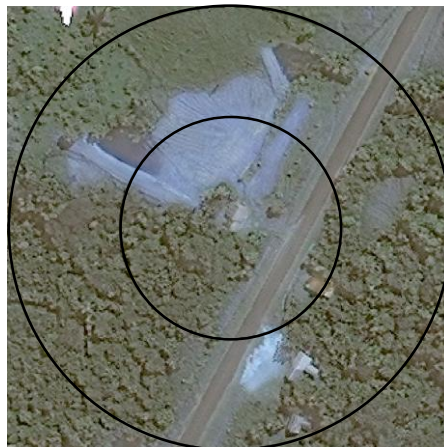

Forest

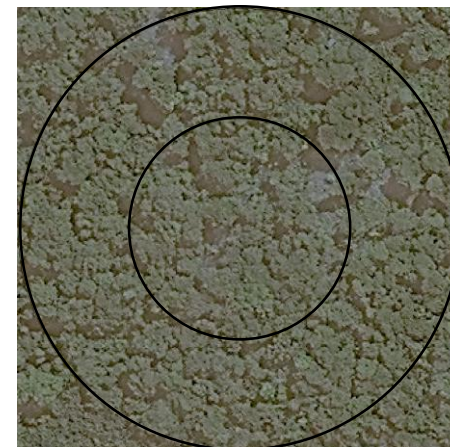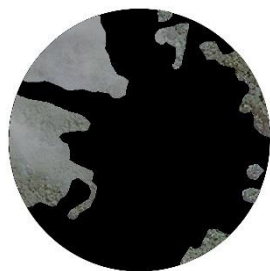

100 m

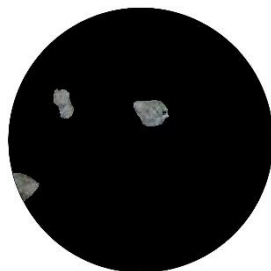

50 m

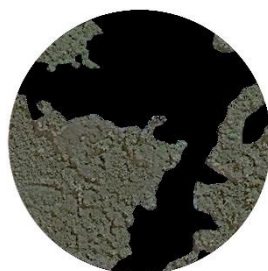

100 m

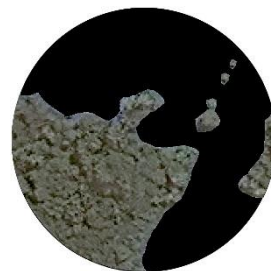

50 m

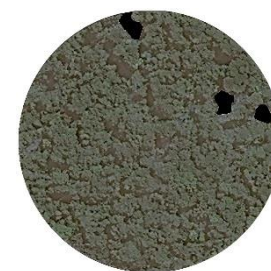

100 m

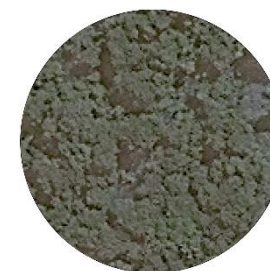

50 m

**Additional file 2.** Exemplar images depicting forest cover determination using satellite imagery. For each of the three forest cover levels, forest cover was calculated at both 50 m (inner circle) and 100 m (outer circle) radii from the collection site. Non-forest areas of the image were selected and colored pure black. The percentage of non-black pixels was determined using GIMP v.2.8.10 image software ([www.gimp.org](http://www.gimp.org)).
