# Supplementary material for: Evidence for temporal population replacement and the signature of ecological adaptation in a major Neotropical malaria vector in Amazonian Peru
Source: PubMed Central journal article supplement (PMC4587789; doi:10.1186/s12936-015-0863-4), 2015-09-29
Supplement: 12936_2015_863_MOESM4_ESM.pdf [file 12936_2015_863_MOESM4_ESM.pdf]

**Additional file 4.** Anopheles darlingi-specific microsatellite loci employed in this study and the length of the 72°C extension step at the end of the PCR program for each.

| Locus   | Forward/<br>Reverse | Primer Sequence (5' - 3')                                          | Fluorophore | Length of<br>Extension Step | Source                       |
|---------|---------------------|--------------------------------------------------------------------|-------------|-----------------------------|------------------------------|
| ADC02   | F<br>R              | CAC ACT GGG GCA TCA TTC ATT TC<br>TCA CAC TGC GTC CTT AGA CAC TG   | FAM         | 5 minutes                   | Conn <i>et al.</i> (2001)    |
| ADC28   | F<br>R              | CTC GTC GTC AGC GTC GTG C<br>TGC CCA TCC ACT GCG TAA CGG           | FAM         | 5 minutes                   | Conn <i>et al.</i> (2001)    |
| ADC110  | F<br>R              | CCG AAC AAC AGC CAA CAG CTG TG<br>CGT TCG ACA CAA TCG TTA CAC ACG  | HEX         | 5 minutes                   | Conn <i>et al.</i> (2001)    |
| ADC137  | F<br>R              | TCT TAC GGG AAT GGT GCG ACG CTC<br>CAG CCA CCC ATA CGC TGT TGA CCA | HEX         | 5 minutes                   | Conn <i>et al.</i> (2001)    |
| ADC138  | F<br>R              | CTT TGA GCC GGT GCT GTG CTG C<br>CCA TTC TCG CAG CCT CCA GGA C     | FAM         | 30 minutes                  | Conn <i>et al.</i> (2001)    |
| ADA03   | F<br>R              | AGA GAG CTA ATG CGG TTG GTC<br>ACG TTC CTC TAC TCC GAA AGC         | FAM         | 30 minutes                  | Lima <i>et al.</i> (2010)    |
| ADA20   | F<br>R              | AGC AAT ATG TTC CCG ACA GC<br>CGG CTT CTA AAT GAC TCC TAG C        | FAM         | 30 minutes                  | Lima <i>et al.</i> (2010)    |
| ADA27   | F<br>R              | AGC GGA TCT ACC TAC GGG TTA<br>CGC TAT CAG CAT CAT CAT CG          | FAM         | 5 minutes                   | Lima <i>et al.</i> (2010)    |
| ADA32   | F<br>R              | TCA CTA GCG TAT GTG CGA GG<br>TCG AAT GAC CTT TGG GAG AC           | HEX         | 5 minutes                   | Lima <i>et al.</i> (2010)    |
| ADA39   | F<br>R              | GAT CGC AGT AGC TGA AAG TCG<br>GAA TAT CGC GGT GGA TCA G           | HEX         | 5 minutes                   | Lima <i>et al.</i> (2010)    |
| ADA40   | F<br>R              | TAC TAC TGA TTG GCG CTC CTG<br>ACT ACG GGT CCT CTC GTG TTC         | FAM         | 30 minutes                  | Lima <i>et al.</i> (2010)    |
| ADA41   | F<br>R              | CGC TGA GAA CAT TGG GTA GTC<br>GTG GTA CTG CGA GGA TCA AAG         | FAM         | 5 minutes                   | Lima <i>et al.</i> (2010)    |
| ADC107n | F<br>R              | GTC CAC TCC CAG GCA CAC<br>AGC AAT CGA GGC AAA CTT TC              | HEX         | 30 minutes                  | Angêlla <i>et al.</i> (2014) |
| ADSP2   | F<br>R              | GCA TAT ATT CTC GCC GCA TT<br>TCA GCT ACT ACC CGA CGA CA           | FAM         | 5 minutes                   | Angêlla <i>et al.</i> (2014) |
| ADMP9   | F<br>R              | ACA ACG TCC AAT GCA ACA AC<br>CTC GAG GGC TTT CTG TAT CG           | HEX         | 5 minutes                   | Angêlla <i>et al.</i> (2014) |
