# Supplementary material for: Evidence for temporal population replacement and the signature of ecological adaptation in a major Neotropical malaria vector in Amazonian Peru
Source: PubMed Central journal article supplement (PMC4587789; doi:10.1186/s12936-015-0863-4), 2015-09-29
Supplement: 12936_2015_863_MOESM5_ESM.pdf [file 12936_2015_863_MOESM5_ESM.pdf]

**A**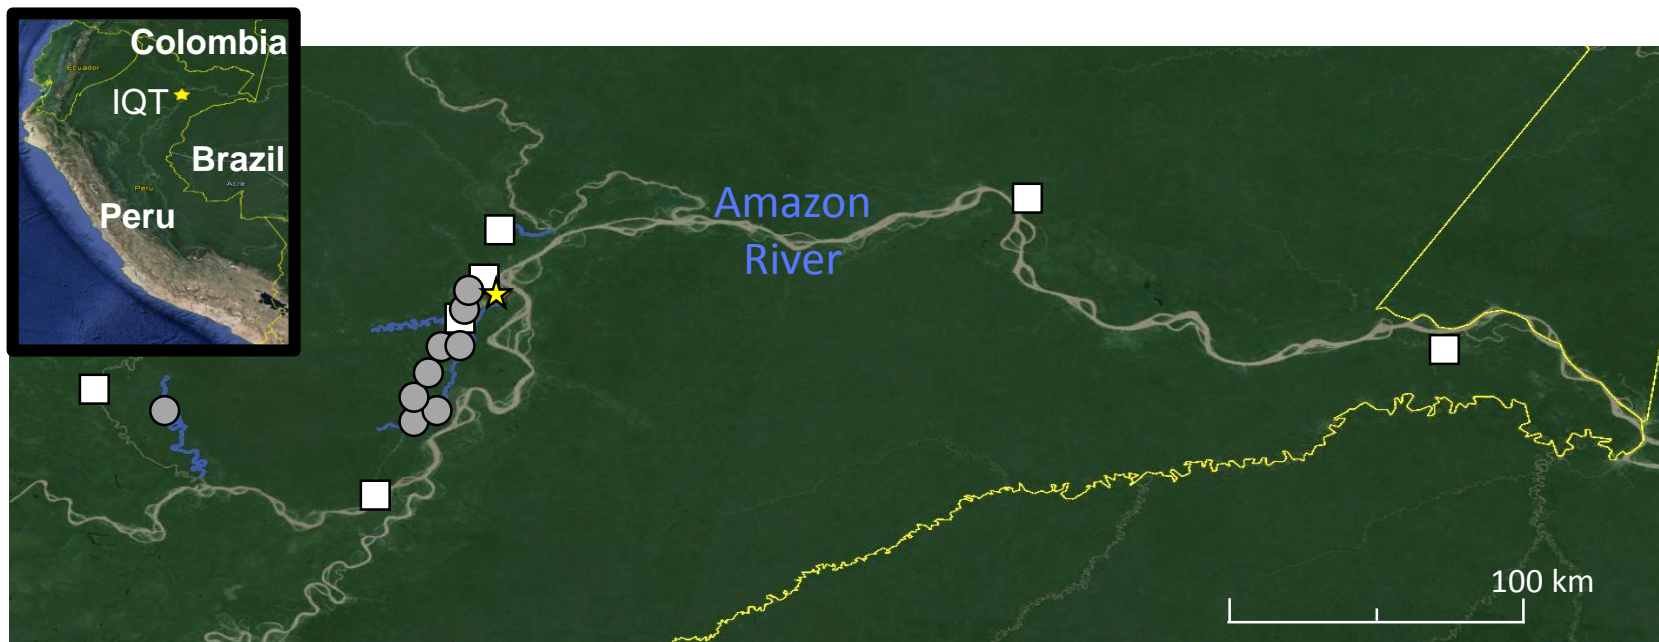**B**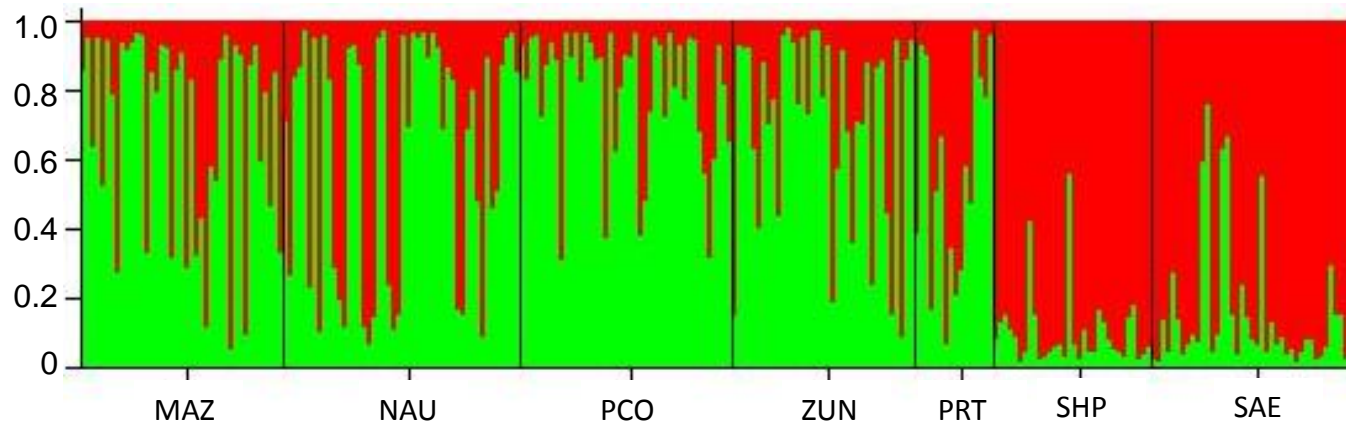

**Additional file 5.** Reanalysis of *Anopheles darlingi* collected in the peri-Iquitos region in 2006, using microsatellites. **(A)** *Anopheles darlingi* collection sites from 2006 (white squares) and 2012-2014 (grey circles) near Iquitos, Loreto, Peru (yellow star). **(B)** Population structure of *Anopheles darlingi* collected in the peri-Iquitos region in 2006, reanalyzed using thirteen microsatellite loci. Collection of these specimens was previously described by Mirabello *et al.* [46]. Optimal  $K = 2$ . MAZ = Mazan; NAU = Nauta; PCO = Padre Cocha; ZUN = Zungarococha; PRT = Piura, Rio Tigre; SHP = Shishita, Pevas; SAE = San Esteban.
