# Supplementary material for: Evidence for temporal population replacement and the signature of ecological adaptation in a major Neotropical malaria vector in Amazonian Peru
Source: PubMed Central journal article supplement (PMC4587789; doi:10.1186/s12936-015-0863-4), 2015-09-29
Supplement: 12936_2015_863_MOESM7_ESM.pdf [file 12936_2015_863_MOESM7_ESM.pdf]

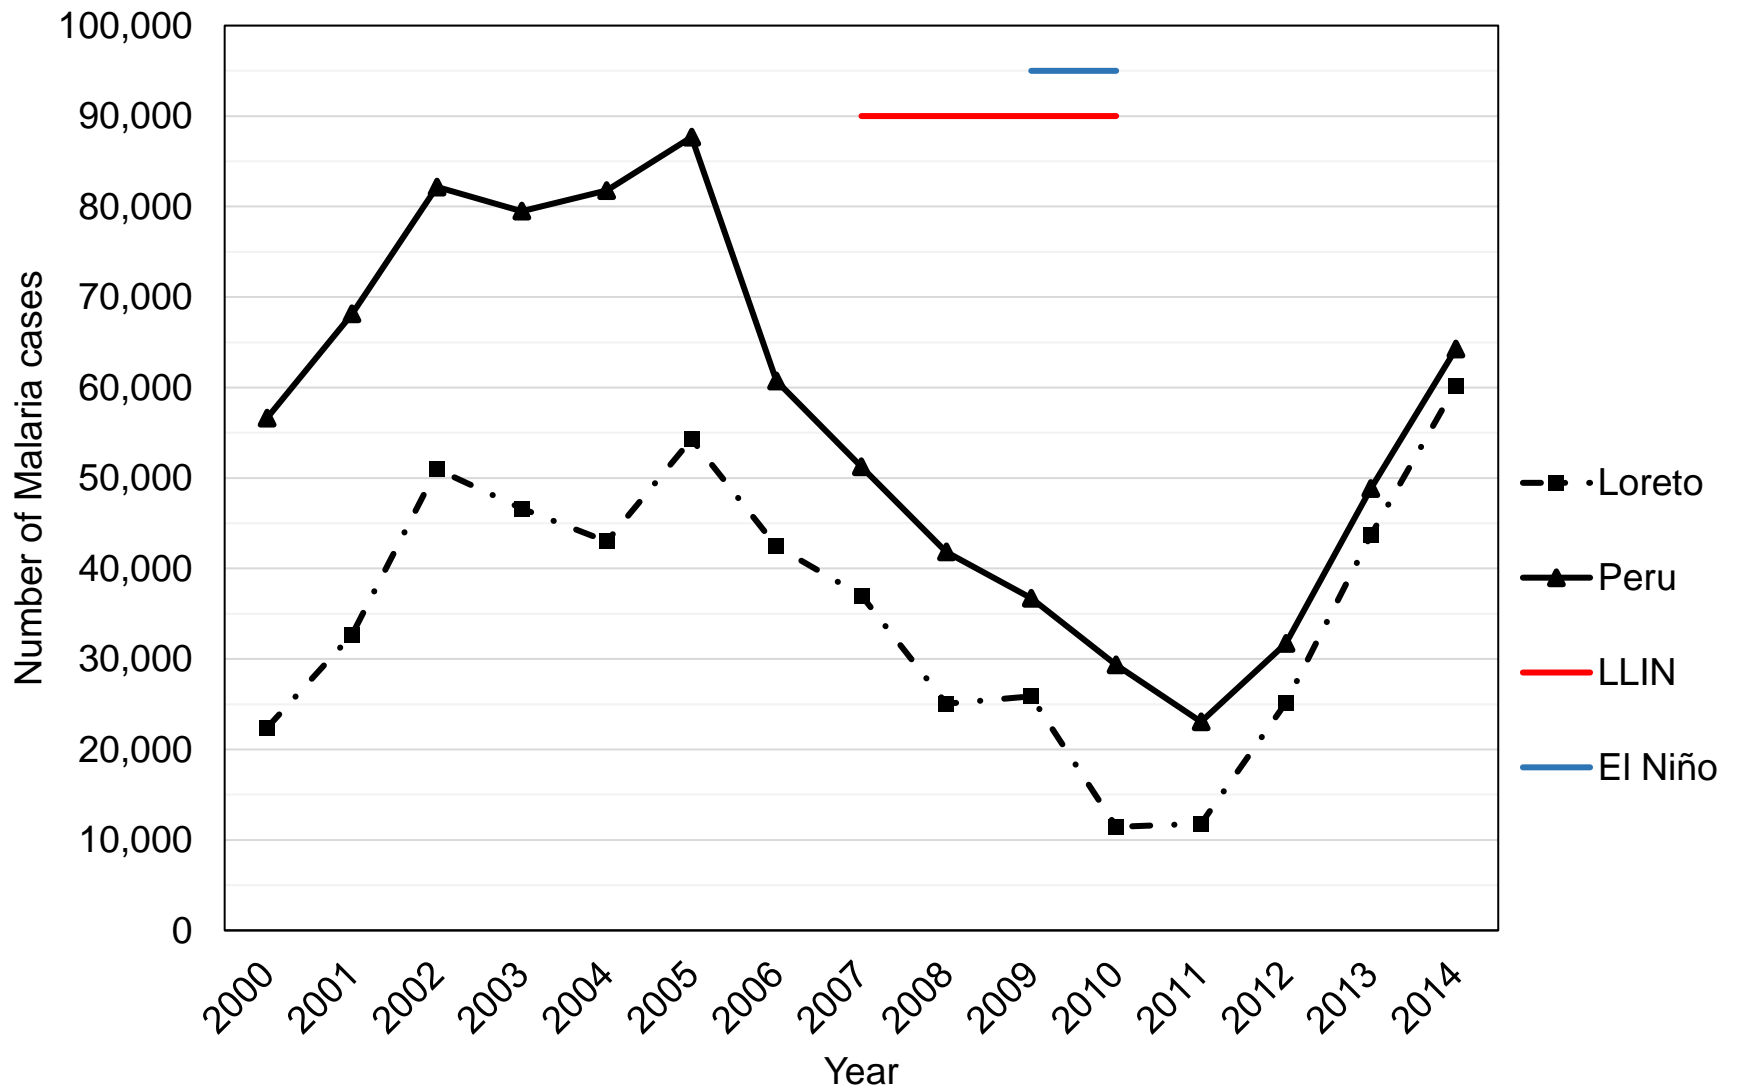

**Additional file 7.** Number of malaria cases (*Plasmodium vivax* and *Plasmodium falciparum*) in all of Peru (solid line, triangle markers) versus Loreto department (dashed line, square markers) (RENACE 2014). Timing of PAMAFRO long lasting insecticidal net distribution (LLIN; red solid line) and El Niño event (blue solid line) shown (NWS; OAS 2011).
